# Supplementary material for: Association between hand grip strength and quality of life in children with cerebral palsy: a cross-sectional study
Source: PeerJ. 2024 Dec 16;12:e18679. doi: 10.7717/peerj.18679 (PMC11657191; doi:10.7717/peerj.18679)
Supplement: Supplemental Information 1 [file peerj-12-18679-s001.xlsx]

## Sheet: Form Responses 1
id	Gender	gender_code	Group	GMFCS levels	Age (years)	City	Nationality	Birth history	Height	Weight	BMI	Dominant Hand	dominant_hand_code	Housing type	housing type_code	School attendance	school_attendance_code	Number of siblings	Hand Grip Strength 1	Hand Grip Strength 2	Hand Grip Strength 3	average of Hand Grip Strength	1. Has your child felt fit and well?	2. Has your child felt full of energy?	3. Has your child felt sad?	4. Has your child felt lonely?	5. Has your child had enough time for him/herself?	6. Has your child been able to do the things that he/she wants to do in his/her free time?	7. Has your child felt that his/her parent(s) treated him/her fairly?	8. Has your child had fun with his/her friends?	9. Has your child got on well at school?	10. Has your child been able to pay attention?	sum score	In general, how would your child rate her/his health?	In general, how would your child rate her/his health?_code
1	Female	2	Typical Developing		8	Riyadh	Saudi	Preterm	118	33	23.7001	Right	1	House with yard	1	YES	1	4	10	12	10	10.6667	5	4	5	5	5	5	5	5	5	5	49	5	Excellent
2	Female	2	Typical Developing		12	Riyadh	Saudi	Preterm	140	55	28.0612	Right	1	House with yard	1	YES	1	5	24	26	24	24.6667	5	5	5	5	5	5	5	5	5	5	50	5	Excellent
3	Female	2	Typical Developing		8	Riyadh	Saudi	Full term	107	17	14.8485	Right	1	House without yard	2	YES	1	1	4	4	6	4.66667	5	4	3	3	5	4	5	4	4	5	42	5	Excellent
4	Male	1	Typical Developing		10	Riyadh	Saudi	Full term	132	26	14.9219	Right	1	House with yard	1	YES	1	9	13	12	13	12.6667	5	4	4	5	4	4	5	5	4	5	45	5	Excellent
5	Female	2	Typical Developing		9	Riyadh	Saudi	Full term	130	32.4	19.1716	Right	1	House with yard	1	YES	1	1	25	24	25	24.6667	5	5	4	5	4	5	5	5	5	5	48	5	Excellent
6	Female	2	Cerebral Palsy	2	8	Riyadh	Saudi	Preterm	121.5	24.4	16.5286	Right	1	House with yard	1	NO	2	2	6	6	8	6.66667	4	3	3	3	5	4	5	4	2	5	38	4	Very good
7	Female	2	Typical Developing		8	Riyadh	Saudi	Full term	114	22	16.9283	Right	1	House with yard	1	YES	1	2	10	10	12	10.6667	5	5	5	5	5	4	5	5	4	5	48	5	Excellent
8	Male	1	Typical Developing		9	Riyadh	Saudi	Full term	130.5	25	14.6798	Right	1	House with yard	1	YES	1	9	12	12	14	12.6667	5	5	5	5	4	4	5	5	5	5	48	5	Excellent
9	Female	2	Typical Developing		9	Riyadh	Saudi	Full term	130	33	19.5266	Right	1	House without yard	2	YES	1	1	6	6	5	5.66667	5	5	3	4	5	4	4	5	5	4	44	5	Excellent
10	Female	2	Cerebral Palsy	1	8	Riyadh	Saudi	Preterm	123	31.2	20.6226	Right	1	House with yard	1	YES	1	4	10	11	12	11	4	3	4	5	5	4	5	4	5	5	44	5	Excellent
11	Male	1	Cerebral Palsy	1	10	Riyadh	Saudi	Preterm	127.5	33	20.2999	Left	2	House with yard	1	YES	1	2	15	15	17	15.6667	1	5	4	5	5	4	5	5	5	5	44	3	Good
12	Female	2	Cerebral Palsy	2	9	Riyadh	Saudi	Full term	116	16.1	11.9649	Right	1	House without yard	2	YES	1	3	9	8	9	8.66667	3	4	3	5	3	4	4	2	3	3	34	4	Very good
13	Male	1	Cerebral Palsy	1	12	Riyadh	Saudi	Preterm	153	41	17.5146	Right	1	House with yard	1	YES	1	3	12	12	16	13.3333	5	3	3	5	4	5	5	4	4	5	43	5	Excellent
14	Female	2	Cerebral Palsy	2	11	Riyadh	Saudi	Full term	141	26	13.0778	Left	2	House with yard	1	YES	1	3	19	18	17	18	4	4	4	5	5	4	5	4	3	5	43	4	Very good
15	Female	2	Typical Developing		11	Riyadh	Saudi	Full term	134	37.8	21.0515	Right	1	House with yard	1	YES	1	3	25	25	30	26.6667	5	5	4	5	5	5	5	5	5	5	49	5	Excellent
16	Male	1	Typical Developing		8	Riyadh	Saudi	Full term	128	28.7	17.5171	Right	1	House with yard	1	YES	1	3	40	35	35	36.6667	5	5	4	5	5	5	5	5	5	4	48	5	Excellent
17	Male	1	Cerebral Palsy	1	9	Riyadh	Saudi	Preterm	124	19	12.3569	Right	1	House with yard	1	YES	1	5	20	20	20	20	3	5	3	5	5	4	5	5	5	4	44	3	Good
18	Female	2	Typical Developing		8	Riyadh	Saudi	Full term	120	34	23.6111	Right	1	House with yard	1	YES	1	2	6	6	7	6.33333	4	4	3	3	4	3	3	4	3	3	34	4	Very good
19	Female	2	Cerebral Palsy	1	9	Riyadh	Saudi	Full term	112	16.7	13.3131	Left	2	House with yard	1	YES	1	5	10	11	11	10.6667	4	4	4	5	5	3	4	5	5	5	44	3	Good
20	Male	1	Typical Developing		8	Riyadh	Saudi	Full term	120	37	25.6944	Right	1	House without yard	2	YES	1	8	20	20	20	20	5	4	2	3	4	5	5	5	5	5	43	5	Excellent
21	Male	1	Cerebral Palsy	1	9	Riyadh	Saudi	Preterm	124	20.7	13.4625	Left	2	House with yard	1	YES	1	3	25	25	25	25	5	5	5	5	5	5	5	5	5	5	50	5	Excellent
22	Female	2	Cerebral Palsy	2	10	Riyadh	Saudi	Preterm	110.5	16.3	13.3494	Right	1	House with yard	1	NO	2	0	10	9	9	9.33333	1	5	5	4	5	4	5	5	2	4	40	5	Excellent
23	Male	1	Cerebral Palsy	1	9	Riyadh	Saudi	Preterm	117	18	13.1492	Left	2	House without yard	2	YES	1	1	20	21	20	20.3333	5	5	4	5	5	4	5	5	5	5	48	5	Excellent
24	Male	1	Cerebral Palsy	1	11	Riyadh	Saudi	Full term	122	22.1	14.8482	Right	1	House with yard	1	YES	1	2	15	18	21	18	4	5	4	5	5	4	5	5	5	4	46	4	Very good
25	Male	1	Cerebral Palsy	1	9	Riyadh	Saudi	Preterm	121	21.2	14.4799	Right	1	House with yard	1	YES	1	3	27	26	25	26	4	4	3	3	1	1	4	5	5	3	33	4	Very good
26	Male	1	Typical Developing		10	Riyadh	Saudi	Full term	136	42	22.7076	Right	1	House with yard	1	YES	1	5	27	27	30	28	5	5	4	5	5	5	5	5	5	5	49	5	Excellent
27	Male	1	Typical Developing		9	Riyadh	Saudi	Full term	132	30	17.2176	Right	1	House with yard	1	YES	1	5	26	25	26	25.6667	5	5	5	5	5	4	5	5	5	5	49	5	Excellent
28	Male	1	Typical Developing		12	Riyadh	Saudi	Full term	143	55	26.8962	Right	1	House with yard	1	YES	1	5	34	34	32	33.3333	5	5	5	5	4	4	5	5	5	5	48	5	Excellent
29	Female	2	Cerebral Palsy	3	9	Riyadh	Saudi	Preterm	110	16	13.2	Right	1	House with yard	1	YES	1	3	15	14	13	14	3	4	3	4	2	4	4	4	4	4	36	4	Very good
30	Female	2	Cerebral Palsy	3	10	Riyadh	Saudi	Preterm	120	20	13.91	Right	1	House with yard	1	NO	2	2	12	11	12	11.6667	3	3	2	3	3	3	4	4	2	3	30	3	Good
31	Female	2	Typical Developing		8	Riyadh	Saudi	Preterm	118	33	23.7001	Right	1	House with yard	1	YES	1	4	10	12	10	10.6667	5	4	5	5	5	5	5	5	5	5	49	5	Excellent
32	Female	2	Typical Developing		12	Riyadh	Saudi	Preterm	140	55	28.0612	Right	1	House with yard	1	YES	1	5	24	26	24	24.6667	5	5	5	5	5	5	5	5	5	5	50	5	Excellent
33	Female	2	Typical Developing		8	Riyadh	Saudi	Full term	107	17	14.8485	Right	1	House without yard	2	YES	1	1	4	4	6	4.66667	5	4	3	3	5	4	5	4	4	5	42	5	Excellent
34	Male	1	Typical Developing		10	Riyadh	Saudi	Full term	132	26	14.9219	Left	2	House with yard	1	YES	1	9	13	12	13	12.6667	5	4	4	5	4	4	5	5	4	5	45	5	Excellent
35	Female	2	Typical Developing		9	Riyadh	Saudi	Full term	130	32.4	19.1716	Right	1	House without yard	2	YES	1	1	25	24	25	24.6667	5	5	4	5	4	5	5	5	5	5	48	5	Excellent
36	Female	2	Cerebral Palsy	2	8	Riyadh	Saudi	Preterm	121.5	24.4	16.5286	Right	1	House with yard	1	NO	2	2	6	6	8	6.66667	4	3	3	3	5	4	5	4	2	5	38	4	Very good
37	Female	2	Typical Developing		8	Riyadh	Saudi	Full term	114	22	16.9283	Right	1	House without yard	2	YES	1	2	10	10	12	10.6667	5	5	5	5	5	4	5	5	4	5	48	5	Excellent
38	Male	1	Typical Developing		9	Riyadh	Saudi	Full term	130.5	25	14.6798	Left	2	House with yard	1	YES	1	9	12	12	14	12.6667	5	5	5	5	4	4	5	5	5	5	48	5	Excellent
39	Female	2	Typical Developing		9	Riyadh	Saudi	Full term	130	33	19.5266	Right	1	House without yard	2	YES	1	1	6	6	5	5.66667	5	5	3	4	5	4	4	5	5	4	44	5	Excellent
40	Female	2	Cerebral Palsy	3	8	Riyadh	Saudi	Preterm	123	31.2	20.6226	Right	1	House with yard	1	YES	1	3	13	12	11	12	4	3	4	5	5	4	5	4	5	5	44	5	Excellent
41	Male	1	Cerebral Palsy	2	10	Riyadh	Saudi	Preterm	127.5	33	20.2999	Left	2	House with yard	1	YES	1	2	15	15	17	15.6667	1	5	4	5	5	4	5	5	5	5	44	3	Good
42	Female	2	Cerebral Palsy	3	9	Riyadh	Saudi	Full term	116	16.1	11.9649	Right	1	House without yard	2	YES	1	2	10	9	8	9	3	4	3	5	3	4	4	2	3	3	34	4	Very good
43	Male	1	Cerebral Palsy	3	12	Riyadh	Saudi	Preterm	153	41	17.5146	Right	1	House with yard	1	YES	1	2	12	12	16	13.3333	5	3	3	5	4	5	5	4	4	5	43	5	Excellent
44	Female	2	Cerebral Palsy	2	11	Riyadh	Saudi	Full term	141	26	13.0778	Left	2	House with yard	1	YES	1	3	19	18	15	17.3333	4	4	4	5	5	4	5	4	3	5	43	4	Very good
45	Female	2	Typical Developing		11	Riyadh	Saudi	Full term	134	37.8	21.0515	Right	1	House without yard	2	YES	1	3	25	25	30	26.6667	5	5	4	5	5	5	5	5	5	5	49	5	Excellent
46	Male	1	Typical Developing		8	Riyadh	Saudi	Full term	128	28.7	17.5171	Right	1	House without yard	2	YES	1	3	40	35	35	36.6667	5	5	4	5	5	5	5	5	5	4	48	5	Excellent
47	Male	1	Cerebral Palsy	2	9	Riyadh	Saudi	Preterm	124	19	12.3569	Right	1	House with yard	1	YES	1	5	20	20	20	20	3	5	3	5	5	4	5	5	5	4	44	3	Good
48	Female	2	Typical Developing		8	Riyadh	Saudi	Full term	120	34	23.6111	Right	1	House with yard	1	YES	1	2	6	6	7	6.33333	4	4	3	3	4	3	3	4	3	3	34	4	Very good
49	Female	2	Cerebral Palsy	3	9	Riyadh	Saudi	Full term	112	16.7	13.3131	Left	2	House with yard	1	YES	1	4	10	9	9	9.33333	4	4	4	5	5	3	4	5	5	5	44	3	Good
50	Male	1	Typical Developing		8	Riyadh	Saudi	Full term	120	37	25.6944	Right	1	House without yard	2	YES	1	3	20	20	20	20	5	4	2	3	4	5	5	5	5	5	43	5	Excellent
51	Male	1	Cerebral Palsy	2	9	Riyadh	Saudi	Preterm	124	20.7	13.4625	Left	2	House with yard	1	YES	1	3	25	25	25	25	5	5	5	5	5	5	5	5	5	5	50	5	Excellent
52	Female	2	Cerebral Palsy	1	10	Riyadh	Saudi	Preterm	110.5	16.3	13.3494	Right	1	House with yard	1	NO	2	0	10	11	9	10	1	5	5	4	5	4	5	5	2	4	40	5	Excellent
53	Male	1	Cerebral Palsy	1	9	Riyadh	Saudi	Preterm	117	18	13.1492	Left	2	House without yard	2	YES	1	1	20	21	20	20.3333	5	5	4	5	5	4	5	5	5	5	48	5	Excellent
54	Male	1	Cerebral Palsy	1	11	Riyadh	Saudi	Full term	122	22.1	14.8482	Right	1	House with yard	1	YES	1	2	15	18	21	18	4	5	4	5	5	4	5	5	5	4	46	4	Very good
55	Male	1	Cerebral Palsy	2	9	Riyadh	Saudi	Preterm	121	21.2	14.4799	Right	1	House with yard	1	YES	1	3	27	26	25	26	4	4	3	3	1	1	4	5	5	3	33	4	Very good
56	Male	1	Typical Developing		10	Riyadh	Saudi	Full term	136	42	22.7076	Right	1	House with yard	1	YES	1	4	27	27	30	28	5	5	4	5	5	5	5	5	5	5	49	5	Excellent
57	Male	1	Typical Developing		9	Riyadh	Saudi	Full term	132	30	17.2176	Right	1	House with yard	1	YES	1	4	26	25	26	25.6667	5	5	5	5	5	4	5	5	5	5	49	5	Excellent
58	Male	1	Typical Developing		12	Riyadh	Saudi	Full term	143	55	26.8962	Right	1	House with yard	1	YES	1	2	34	34	32	33.3333	5	5	5	5	4	4	5	5	5	5	48	5	Excellent
59	Female	2	Cerebral Palsy	1	9	Riyadh	Saudi	Preterm	110	16	13.2	Right	1	House with yard	1	YES	1	3	16	15	14	15	3	4	3	4	2	4	4	4	4	4	36	4	Very good
60	Female	2	Cerebral Palsy	2	10	Riyadh	Saudi	Preterm	120	20	13.91	Right	1	House with yard	1	NO	2	2	18	19	17	18	3	3	2	3	3	3	4	4	2	3	30	3	Good
